# Supplementary material for: In situ soft-chemistry synthesis of β-Na0.33V2O5 nanorods as high-performance cathode for lithium-ion batteries
Source: Royal Society of Chemistry journal article supplement (doi:10.1039/c6ra23484d), 2016-01-01
Supplement: c6ra23484d1.pdf [file c6ra23484d1.pdf]

Electronic Supplementary Information for

## ***In-situ* soft chemistry synthesis of $\beta$ - $\text{Na}_{0.33}\text{V}_2\text{O}_5$ nanorods as high-performance cathode for lithium-ion batteries**

Pan-Pan Wang,<sup>a, b</sup> Cheng-Yan Xu,<sup>a, b, \*</sup> Fei-Xiang Ma,<sup>a, b</sup> Li Yang,<sup>a</sup> Liang Zhen<sup>a, b, \*</sup>

<sup>a</sup> School of Materials Science and Engineering, Harbin Institute of Technology, Harbin 150001, China.

<sup>b</sup> MOE Key Laboratory of Micro-System and Micro-Structures Manufacturing, Harbin Institute of Technology, Harbin 150080, China

Tel: 86 451 8641 2133; Fax: 86 451 8641 3921; E-mail: cy\_xu@hit.edu.cn; lzhen@hit.edu.cn.

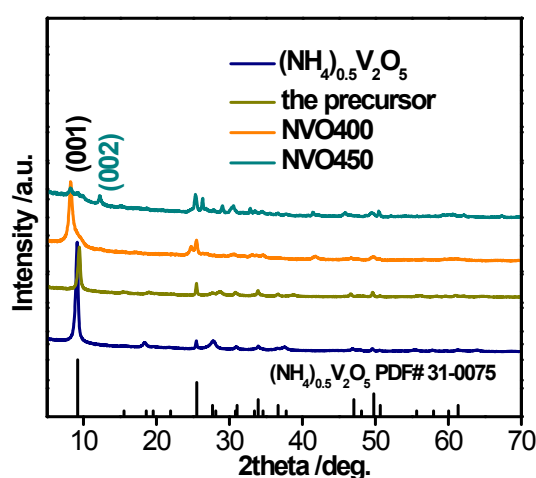

Fig. S1 XRD patterns of (NH<sub>4</sub>)<sub>0.5</sub>V<sub>2</sub>O<sub>5</sub>, Na-intercalated precursor and calcination products under 400 and 450 °C.

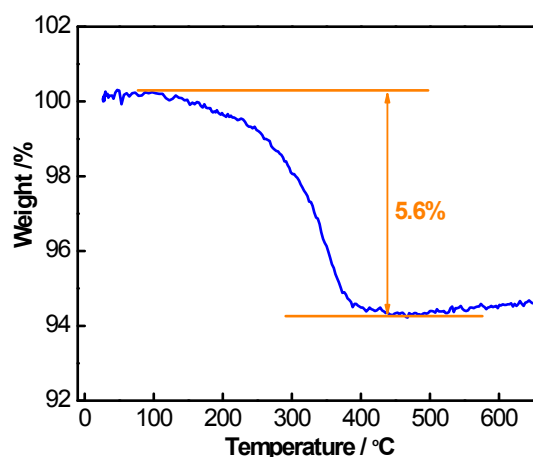

Fig. S2 TG curve of Na-intercalated precursor recorded at a ramping rate of 10 °C min<sup>-1</sup>.

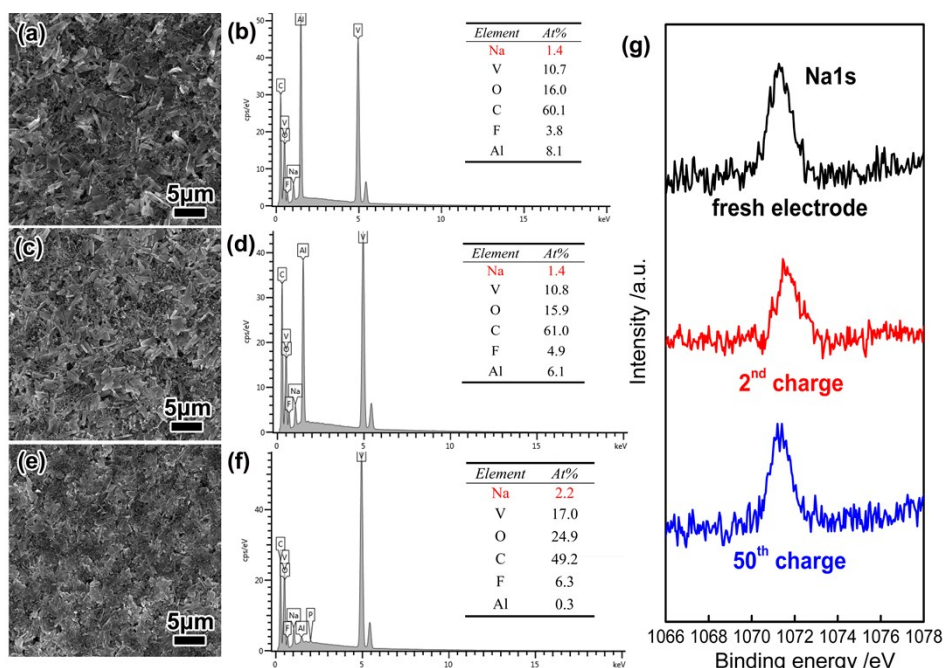

**Fig. S3** SEM images, EDX and XPS spectra of NVO600 electrode under different states: (a, b) before cycling; (c, d) 2<sup>nd</sup> charge state; (e, f) 50<sup>th</sup> charge state. (g) Comparison of Na 1s spectra.

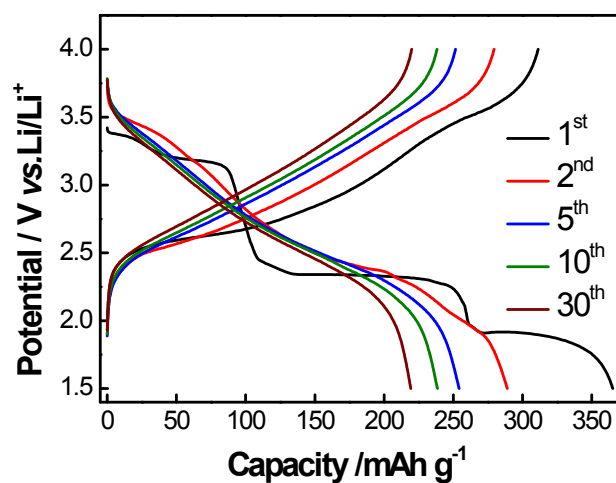

**Fig. S4** Charge-discharge curves of the V<sub>2</sub>O<sub>5</sub> electrode at current density of 60 mA g<sup>-1</sup>.

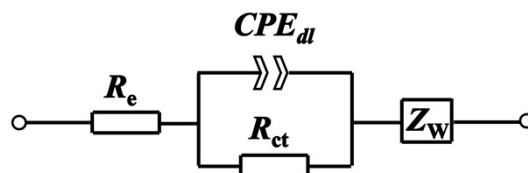

**Fig. S5** The equivalent circuit model for EIS analysis.

**Table S1.** Comparison of electrochemical performance for  $\beta$ -Na<sub>0.33</sub>V<sub>2</sub>O<sub>5</sub> cathode.

| Electrode materials                                                          | Current density (mA g <sup>-1</sup> ) | Voltage range (V) | Capacity after cycles (mAh g <sup>-1</sup> ) /cycle number | Capacity retention | Refs.     |
|------------------------------------------------------------------------------|---------------------------------------|-------------------|------------------------------------------------------------|--------------------|-----------|
| $\beta$ -Na <sub>0.33</sub> V <sub>2</sub> O <sub>5</sub> microspheres       | 1000                                  | 1.5–4.0           | 111 /35                                                    | 70.7%              | [S1]      |
| mesoporous $\beta$ -Na <sub>0.33</sub> V <sub>2</sub> O <sub>5</sub>         | 50                                    | 1.5–4.0           | 177 /50                                                    | 60.2%              | [S2]      |
| NaV <sub>6</sub> O <sub>15</sub> nanorods                                    | 50                                    | 1.5–4.5           | 297 /60                                                    | ----               | [S3]      |
| highly crystalline $\beta$ -Na <sub>0.33</sub> V <sub>2</sub> O <sub>5</sub> | 3.8                                   | 1.5–4.0           | 253 /70                                                    | 89%                | [S4]      |
| Na <sub>0.33</sub> V <sub>2</sub> O <sub>5</sub> -graphene hybrids           | 150                                   | 1.5–4.0           | 310 /50                                                    | 94.8%              | [S5]      |
| $\beta$ -Na <sub>0.33</sub> V <sub>2</sub> O <sub>5</sub> nanorods           | 60                                    | 1.5–4.0           | 182 /50                                                    | 81.3%              | This work |

**Table S2.** EIS fitted results for NVO600 electrode after different cycles.

| Cycles            | 1st   | 10th  | 20th  | 50th  |
|-------------------|-------|-------|-------|-------|
| $R_e / \Omega$    | 5.809 | 4.467 | 4.088 | 4.137 |
| $R_{ct} / \Omega$ | 135.8 | 223.7 | 226.5 | 263.4 |

**References:**

- [S1] Q.G. Tan, Q.Y. Zhu, A.Q. Pan, A.P. Wang, Y. Tang, X.P. Tan, S.Q. Liang, G.Z. Cao, *Cryst. Eng. Comm.*, 2015, 17, 4774-4780.
- [S2] S.Q. Liang, J. Zhou, G.Z. Fang, C. Zhang, J. Wu, Y. Tang, A.Q. Pan, *Electrochim. Acta*, 2014, 130, 119-126.
- [S3] H.M. Liu, Y.G. Wang, L. Li, K.X. Wang, E. Hosono, H.S. Zhou, *J. Mater. Chem.*, 2009, 19, 7885-7891.
- [S4] J.K. Kim, B. Senthilkumar, S.H. Sahgong, J.H. Kim, M.F. Chi, Y. Kim, *ACS Appl. Mater. Interfaces*, 2015, 7, 7025-7032.
- [S5] Y.K. Lu, J. Wu, J. Liu, M. Lei, S.S. Tang, P.J. Lu, L.Y. Yang, H.R. Yang, Q. Yang, *ACS Appl. Mater. Interfaces*, 2015, 7, 17433-17400.
